# Supplementary material
Source: Springer Nature journal article supplement (https://www.springermedizin.de/resource/supplementary/12882_2012_503_MOESM1_ESM.pdf/9454160)
Supplement: MOESM1 [file 9454160]

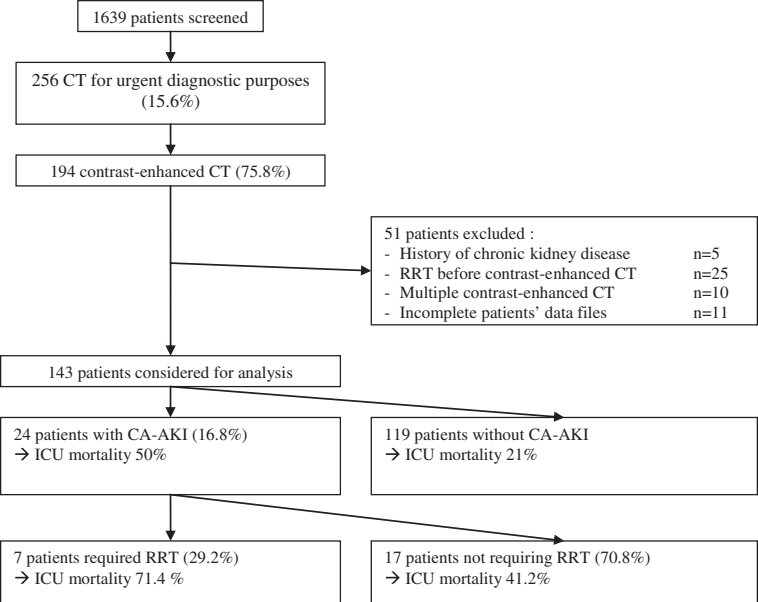

CT : computed-tomography ; RRT : renal replacement therapy ; CA-AKI : contrast induced acute kidney injury
